# Supplementary material
Source: PubMed Central journal article supplement (PMC6686696)
Supplement: Supp_Fig1.pdf [file Supp_Fig1.pdf]

## Supplementary Data

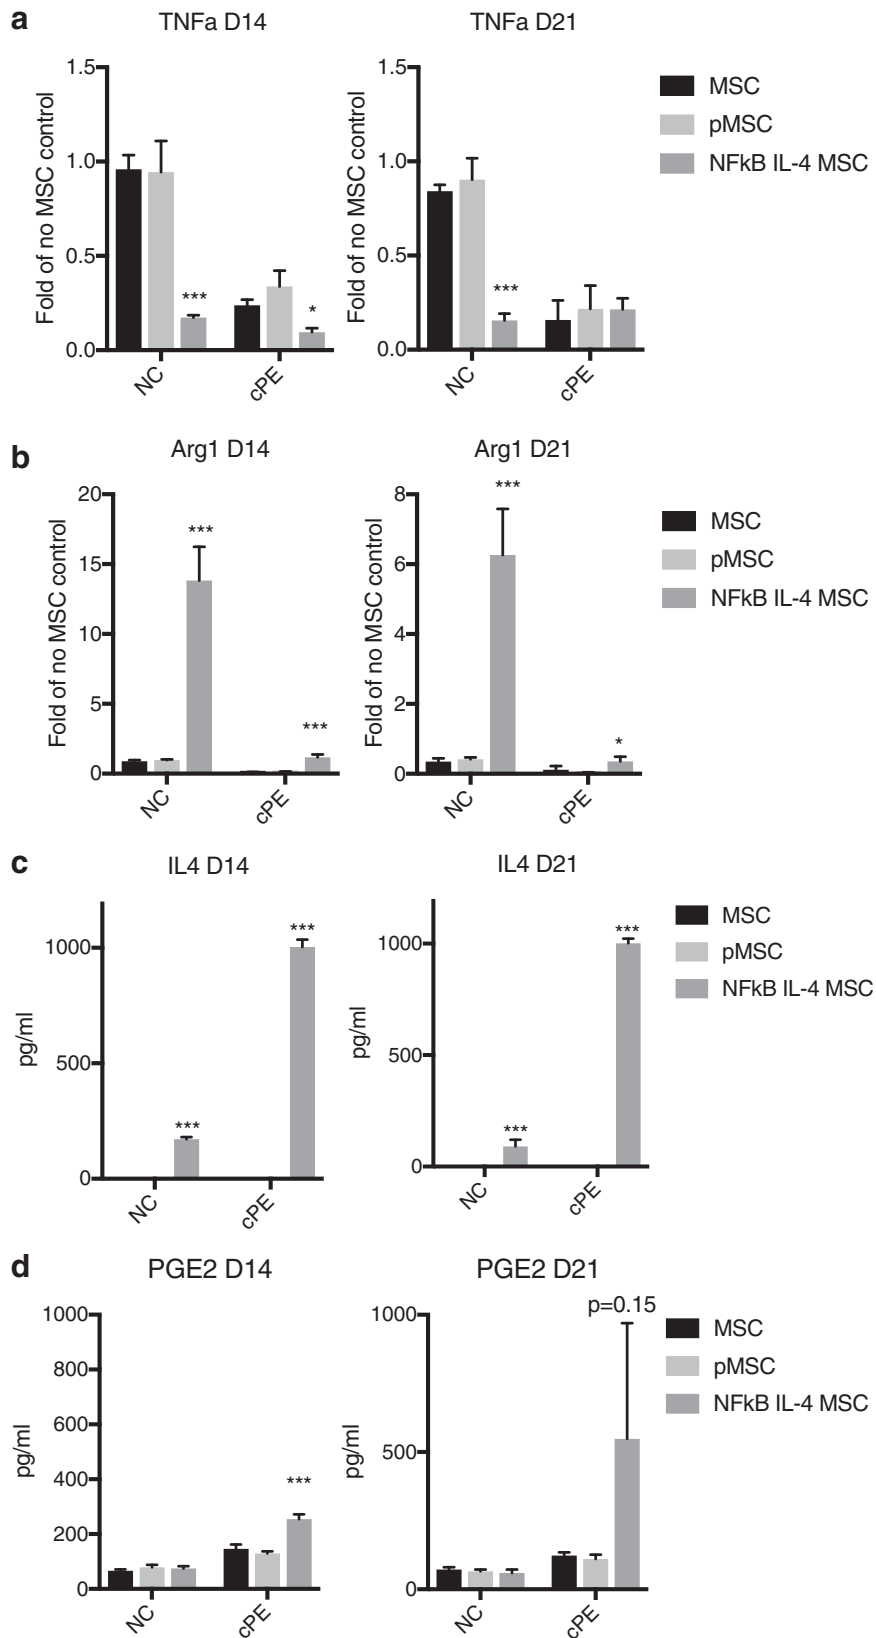

**SUPPLEMENTARY FIG. S1** Expression of macrophage polarization markers and immunomodulatory factors in the MSC-macrophage cocultured cells at later stages. The RNA expression of TNF $\alpha$  (**a**) and Arg1 (**b**) at day 14 and 21 in the MSC-macrophage at the bottom chamber were examined by quantitative polymerase chain reaction. IL4 (**c**) and PGE2 (**d**) secretions at day 14 and 21 were examined by ELISA. NC: no particle control; cPE: contaminated polyethylene particles. \* $p < 0.05$ , \*\*\* $p < 0.005$ . MSC, mesenchymal stem cells; TNF $\alpha$ , tumor necrosis factor alpha.
